# Supplementary material for: Cryptic population structure at the northern range margin of the service tree Sorbus domestica
Source: PeerJ. 2022 Dec 5;10:e14397. doi: 10.7717/peerj.14397 (PMC9745788; doi:10.7717/peerj.14397)
Supplement: Table S1 [file peerj-10-14397-s001.xlsx]

## Sheet: Blatt1
Table S1: Summary of the 82 newly genotyped Sorbus domestica trees from Switzerland, with local clones in different colours
SampleName	Pop	Latitude	Longitude	MS14H03FAM		CH01h10At532		CH02c09At550		MSS5At565		BGT23bFAM		CH01h01At550		MSS16At565
11_E03	CH SW	46.2939	6.12139	174	174	126	144	233	233	128	132	199	201	149	149	156	165
20_G05	CH SW	46.3461	6.19689	174	184	116	120	247	251	128	132	199	199	149	149	158	165
23_M05	CH SW	46.1349	5.97575	174	174	124	126	233	235	128	132	197	199	103	139	156	158
24_O05	CH SW	46.6749	6.48615	178	184	120	124	233	249	134	138	199	199	149	149	156	156
56_O13	CH SW	46.8524	6.85574	170	174	128	144	233	249	128	136	197	197	103	149	156	156
69_I17	CH SW	46.8525	6.85619	174	184	116	140	247	249	132	138	197	199	103	103	156	158
70_K17	CH SW	46.8526	6.85635	176	176	126	136	235	247	128	138	199	199	103	103	156	156
72_O17	CH SW	46.8523	6.85539	170	184	116	128	247	247	128	136	197	197	149	149	156	156
75_E19	CH SW	46.8522	6.85518	174	178	120	126	247	249	128	138	199	199	103	103	156	156
89_A23	CH NW	47.3818	7.73571	174	188	126	128	233	247	128	128	199	199	103	103	156	156
90_C23	CH NW	47.3825	7.73535	184	184	124	128	233	249	128	128	197	199	103	139	156	156
99_F01	CH NW	47.3817	7.73625	174	184	116	128	235	249	128	138	199	199	149	149	156	158
100_H01	CH NW	47.4597	7.7493	170	174	126	128	233	233	128	138	199	199	103	149	156	165
49_A13	CH NW	47.4928	7.64111	170	176	116	120	235	247	128	138	199	199	103	149	156	156
2_C01	CH NW	47.4928	7.64114	170	176	116	120	235	247	128	138	199	199	103	149	156	156
27_E07	CH NW	47.4948	7.64319	170	184	116	120	235	249	128	132	199	199	149	151	156	165
6_K01	CH NW	47.4881	7.65076	170	178	128	150	233	247	128	132	197	203	103	149	156	156
26_C07	CH NW	47.4928	7.64113	170	178	128	150	233	247	128	132	197	203	103	149	156	156
1_A01	CH NW	47.4881	7.65072	170	178	128	150	233	247	128	132	197	203	103	149	156	156
28_G07	CH NW	47.4882	7.65077	170	178	128	150	233	247	128	132	197	203	103	149	156	156
29_I07	CH NW	47.4838	7.78078	170	174	120	126	233	247	128	128	199	199	149	151	156	165
30_K07	CH NW	47.4762	7.70446	170	170	116	128	233	247	128	128	197	199	151	151	156	158
32_O07	CH NW	47.4565	7.75444	170	174	120	128	247	249	128	134	197	199	103	149	156	156
33_A09	CH NW	47.4817	7.77383	170	174	124	126	233	249	128	128	199	199	149	149	156	156
36_G09	CH NW	47.4947	7.6498	170	170	124	126	247	249	132	138	199	201	103	151	156	156
38_K09	CH NW	47.5027	7.77543	170	170	126	128	233	249	134	138	197	199	103	103	156	165
39_M09	CH NW	47.477	7.77113	170	170	120	128	233	233	132	138	199	199	149	151	156	156
40_O09	CH NW	47.4613	7.77854	170	170	116	128	233	233	128	138	199	199	149	149	156	156
41_A11	CH NW	47.4564	7.75419	170	174	116	126	249	249	128	132	199	199	149	149	156	156
42_C11	CH NW	47.4632	7.77706	170	174	126	128	233	249	132	138	197	199	149	149	156	156
43_E11	CH NW	47.4646	7.81238	174	174	116	126	233	233	134	138	197	199	149	149	156	156
34_C09	CH NW	47.4565	7.75428	170	174	116	116	233	233	134	134	197	197	149	149	156	156
44_G11	CH NW	47.4744	7.78752	170	174	116	116	233	233	134	134	197	197	149	149	156	156
45_I11	CH NW	47.4927	7.64143	170	170	120	128	235	235	128	132	199	199	151	151	156	165
46_K11	CH NW	47.5062	7.62316	170	170	116	116	249	249	132	142	197	199	149	149	156	156
48_O11	CH NW	47.4789	7.76911	170	170	120	124	233	247	128	138	197	197	149	151	156	165
5_I01	CH NW	47.5074	7.62699	170	170	124	126	249	249	132	138	199	199	103	149	156	158
50_C13	CH NW	47.5054	7.62451	174	176	116	124	247	247	128	138	199	199	103	149	156	156
54_K13	CH-NW	47.4817	7.77445	170	170	116	126	233	249	134	138	197	199	103	103	103	103
55_M13	CH NW	47.4816	7.77455	170	170	116	126	233	249	134	138	197	199	103	149	156	156
61_I15	CH NW	47.4797	7.76418	170	170	116	126	233	249	132	134	199	199	103	139	156	156
52_G13	CH NW	47.5044	7.62485	170	170	116	126	233	249	132	134	199	199	103	139	156	156
61_I15	CH NW	47.4548	7.75899	170	176	120	126	233	249	128	132	199	199	103	149	156	156
64_O15	CH NW	47.5301	7.70973	174	176	126	126	235	247	128	138	199	199	103	149	156	156
65_A17	CH NW	47.5305	7.71092	174	174	120	126	247	249	128	138	199	199	103	103	156	156
67_E17	CH NW	47.5298	7.7093	174	176	126	126	247	249	138	138	199	199	103	103	156	156
80_O19	CH NW	47.4599	7.74911	174	180	126	134	233	251	128	128	197	197	103	103	156	165
81_A21	CH NW	47.5156	7.67435	170	174	116	120	233	233	128	138	199	199	149	151	156	156
82_C21	CH NW	47.4597	7.74892	170	206	134	142	233	235	128	134	197	197	103	103	156	165
86_K21	CH NW	474941590	7.64249	170	170	116	120	235	235	128	128	199	199	149	151	156	165
78_K19	CH NW	47.5151	7.67482	170	170	128	128	233	247	132	134	197	197	149	149	156	156
83_E21	CH NW	47.515	7.67551	170	170	128	128	233	247	132	134	197	197	149	149	156	156
84_G21	CH NW	47.5149	7.67427	170	170	128	128	233	247	132	134	197	197	149	149	156	156
85_I21	CH NW	47.5153	7.67476	170	170	128	128	233	247	132	134	197	197	149	149	156	156
87_M21	CH NW	47.4903	7.76911	170	170	128	128	233	247	132	134	197	197	149	149	156	156
88_O21	CH NW	47.4804	7.76343	170	170	124	128	233	247	132	138	197	199	149	149	156	165
91_E23	CH NW	47.5286	7.70748	174	176	126	126	235	249	138	138	199	199	103	103	156	156
92_G23	CH NW	47.4598	7.74918	170	170	126	128	233	233	128	138	199	199	103	149	156	165
93_I23	CH NW	47.4927	7.64043	170	184	116	116	249	249	132	132	199	199	149	149	156	156
95_M23	CH NW	47.5593	7.58173	176	178	126	126	247	249	138	138	199	199	103	103	156	156
96_O23	CH NW	47.5593	7.5818	174	176	120	126	235	249	128	138	199	199	103	149	156	156
97_B01	CH NW	47.5732	7.59328	178	186	126	126	233	247	128	128	197	197	103	137	156	156
31_M07	CH NW	47.5593	7.58175	174	176	120	136	235	249	128	128	199	199	103	149	156	156
37_I09	CH NW	47.5634	7.57505	174	178	118	142	233	249	128	132	195	199	103	153	156	165
47_M11	CH NW	47.4681	7.91222	174	174	120	128	233	235	128	140	199	199	103	149	156	156
53_I13	CH NW	47.4686	7.91837	184	184	130	144	233	247	132	138	199	199	103	151	156	156
59_E15	CH NW	47.4695	7.91721	174	188	120	130	247	251	128	132	199	199	149	149	156	156
57_A15	CH NW	47.4813	7.90072	174	176	126	126	247	249	128	138	199	199	103	149	156	156
58_C15	CH NW	47.4813	7.90095	176	176	136	136	235	247	128	128	199	199	103	103	156	156
60_G15	CH NW	47.4705	7.92156	174	174	126	126	233	233	134	134	197	199	103	149	156	156
62_K15	CH NW	47.4813	7.90077	174	176	120	136	235	249	128	128	199	199	103	103	156	156
63_M15	CH NW	47.4813	7.90076	176	178	120	136	235	249	128	128	199	199	103	149	156	156
66_C17	CH NW	47.4814	7.90079	176	178	120	126	247	247	128	138	199	199	103	103	156	156
68_G17	CH NW	47.4695	7.92131	184	214	120	126	233	233	128	138	197	199	149	149	156	165
71_M17	CH NW	47.4692	7.9211	174	214	126	128	233	233	128	128	197	199	103	149	156	156
73_A19	CH NW	47.4693	7.91733	170	178	116	120	235	235	128	134	197	199	149	149	165	165
74_C19	CH NW	47.4606	7.90827	168	192	118	120	233	245	132	132	197	201	149	149	156	156
76_G19	CH NW	47.5139	8.17557	170	178	126	126	233	235	128	132	199	199	149	149	165	165
77_I19	CH NW	47.5233	8.17451	174	184	124	128	233	247	128	134	197	199	103	149	158	165
79_M19	CH NW	47.4606	7.90827	168	192	118	120	233	245	132	132	197	201	149	149	156	156
94_K23	CH NW	47.5139	8.17557	170	178	126	126	233	235	128	132	199	199	149	149	165	165
98_D01	CH NW	47.5233	8.17451	174	184	124	128	233	247	128	134	197	199	103	149	158	165
