# Supplementary material for: Cryptic population structure at the northern range margin of the service tree Sorbus domestica
Source: PeerJ. 2022 Dec 5;10:e14397. doi: 10.7717/peerj.14397 (PMC9745788; doi:10.7717/peerj.14397)
Supplement: Table S2 [file peerj-10-14397-s002.xlsx]

## Sheet: Blatt1
Table S2: Number of clones (identical multi-locus genotypes) found at the sampling localities (see Table 2)
Pop	No. clones	Abundance of clones (labeled alphabetically)
CH SW	0
CH NW	5	2 x a,4 x b,5 x c,2 x d,2 x e
CH NE	10	2 x f,2 x g,2 x h,2 x i,2 x j,2 x k,2 x l,2 x m,2 x n,2 x o
GB	5	5 x p,4 x q,14 x r,3 x s,4 x t
F NW	0
AT E1	0
AT E2	1	2 x u
AT E3	1	2 x v
SLO	4	2 x w,8 x y,2 x z,2 x A
HR	0
F C	0
F S	0
IT Elba	0
F Corsica	0
IT N	0
BIH	1	2 x B
SRB	1	2 x C
BG W	1	1 x D
BG SE	4	2 x E,2 x F,2 x G,2 x H
