# Supplementary material for: Cryptic population structure at the northern range margin of the service tree Sorbus domestica
Source: PeerJ. 2022 Dec 5;10:e14397. doi: 10.7717/peerj.14397 (PMC9745788; doi:10.7717/peerj.14397)
Supplement: Table S3 — Genotype data for the 7 microsatellite markers adjusted to the binning of the new Swiss samples. Sources of genetic data are listed. [1], Kamm et al. (2009); [2], George et al. (2016); [3], George et al. (2015); * Unpublished data provided by Jan-Peter George. [file peerj-10-14397-s003.xlsx]

## Sheet: Sheet1
Table S3: Summary of the 534 Sorbus domestica trees from Europe including the new samples from Switzerland
Genotype data for the 7 microsatellite markers adjusted to the binning of the new Swiss samples. Sources of genetic data are listed. [1] = Kamm et al. (2009), [2] = George et al. (2016), [3] = George et al. (2015), * Unpublished data provided by Jan-Peter George.
Individual	Population	Source	MS14H03FAM		CH01h10At532		CH02c09At550		MSS5At565		BGT23bFAM		CH01h01At550		MSS16At565
CW4	GB	[2]	174	184	126	126	247	249	134	138	197	197	135	147	156	158
LN4	GB	[2]	170	174	124	128	249	249	128	136	199	199	135	147	156	156
EA3	GB	[2]	170	174	116	126	235	247	132	132	197	199	103	135	156	158
PK14	GB	[2]	170	174	116	126	247	247	128	136	199	201	103	147	156	165
SH5	GB	[2]	178	184	126	126	235	235	128	132	197	199	103	135	156	158
GS1	GB	[2]	174	174	126	126	247	247	132	136	197	199	103	103	156	156
GS2	GB	[2]	176	184	116	116	233	247	128	136	197	199	137	137	156	156
Corm_22	F NW	[3]	170	174	116	116	247	249	128	132	199	199	0	0	156	156
Corm_23	F NW	[3]	0	0	116	120	233	247	128	138	199	199	103	103	156	156
Corm_24	F NW	[3]	0	0	116	126	235	249	128	136	197	199	103	139	156	156
Corm_28	F NW	[3]	174	184	116	136	247	247	128	134	199	199	103	103	158	158
Corm_30	F NW	[3]	170	174	116	120	247	247	128	134	199	199	103	103	156	158
Corm_33	F NW	[3]	174	174	120	120	247	249	128	138	199	199	103	103	156	165
Corm_34	F NW	[3]	170	174	116	126	239	239	128	132	199	199	103	149	156	165
Corm_35	F NW	[3]	170	170	116	126	233	249	128	142	199	199	103	149	0	0
Corm_36	F NW	[3]	170	170	120	126	235	247	128	128	199	201	147	149	158	165
Corm_37	F NW	[3]	170	184	120	126	235	247	128	128	199	201	139	149	158	165
Corm_38	F NW	[3]	170	170	0	0	235	235	132	138	199	199	103	149	156	156
Corm_39	F NW	[3]	174	174	116	126	247	249	132	132	197	201	103	149	156	165
Corm_40	F NW	[3]	170	184	116	136	247	249	128	128	199	201	103	149	156	156
Corm_41	F NW	[3]	174	182	120	126	233	247	128	138	199	199	103	103	156	165
Corm_42	F NW	[3]	170	170	116	116	239	247	128	128	199	199	103	149	156	158
Corm_43	F NW	[3]	184	184	116	126	233	235	128	138	197	199	103	139	156	158
Corm_44	F NW	[3]	170	170	126	136	247	249	128	128	199	199	103	149	156	158
Corm_45	F NW	[3]	170	176	116	120	249	249	128	138	197	199	139	149	156	156
Corm_46	F NW	[3]	170	190	116	124	249	249	128	128	199	199	103	103	156	156
Corm_47	F NW	[3]	174	178	120	126	233	247	128	134	199	201	103	149	156	156
SD501	F C	[3]	170	184	126	126	235	249	132	138	199	199	103	103	156	156
SD503	F C	[3]	178	184	116	130	235	249	128	132	199	199	103	137	156	158
SD517	F C	[3]	170	186	126	126	233	247	128	134	199	199	103	103	156	156
SD522	F C	[3]	170	170	126	126	233	247	128	128	197	199	103	149	156	158
SD525	F C	[3]	170	170	126	126	249	249	128	138	199	199	103	103	156	158
SD526	F C	[3]	170	170	120	126	247	247	128	138	199	199	103	137	156	156
SD532	F C	[3]	170	184	116	126	0	0	128	132	199	199	103	149	156	156
SD539	F C	[3]	170	182	126	126	247	249	128	138	199	199	103	103	156	156
SD540	F C	[3]	178	184	116	126	233	249	128	128	197	199	103	137	156	156
SD603	F C	[3]	170	178	120	128	247	249	128	138	197	199	139	151	156	156
SD609	F C	[3]	174	186	120	124	247	247	128	134	199	199	103	149	156	165
SD612	F C	[3]	174	176	120	120	0	0	132	134	197	199	103	103	156	156
SD613	F C	[3]	170	170	120	128	233	233	128	138	197	201	103	151	156	158
SD615	F C	[3]	170	182	116	124	233	247	134	138	199	199	151	151	156	158
SD619	F C	[3]	174	184	120	126	235	235	128	138	197	197	103	151	156	158
SD620	F C	[3]	174	174	120	128	249	251	128	134	199	199	103	151	156	158
Frankreich1	F C	[3]	170	184	116	126	233	249	136	138	199	199	103	103	156	165
Frankreich10	F C	[3]	170	184	116	126	233	247	128	134	199	199	103	149	156	156
Frankreich11	F C	[3]	170	184	126	126	235	235	128	138	197	199	103	149	156	156
Frankreich12	F C	[3]	170	184	116	126	235	247	128	128	199	199	103	149	156	156
Frankreich13	F C	[3]	184	184	120	120	233	249	128	128	197	199	103	137	156	156
Frankreich15	F C	[3]	170	174	126	126	233	249	128	128	199	199	103	103	156	158
Frankreich16	F C	[3]	170	184	126	136	247	247	128	138	199	199	103	149	156	156
Frankreich17	F C	[3]	170	184	116	126	233	247	136	138	197	199	103	103	165	165
Frankreich18	F C	[3]	170	178	116	126	233	233	134	136	199	199	103	151	156	156
Frankreich2	F C	[3]	174	184	126	126	233	233	134	136	199	199	103	103	156	165
Frankreich3	F C	[3]	178	184	126	126	233	247	128	128	199	199	103	103	156	158
Frankreich4	F C	[3]	170	184	126	126	233	233	136	138	197	199	103	103	156	165
Frankreich5	F C	[3]	170	182	126	126	233	251	134	134	199	199	103	103	156	165
Frankreich6	F C	[3]	174	180	124	142	0	0	134	136	197	199	103	103	156	156
Frankreich7	F C	[3]	170	184	124	126	233	235	128	134	199	199	103	149	156	156
Frankreich8	F C	[3]	174	184	126	130	247	249	128	134	199	199	103	103	156	165
Frankreich9	F C	[3]	174	176	116	124	233	247	128	134	199	199	103	103	0	0
SD003	F S	[3]	180	184	120	128	0	0	138	138	199	199	149	149	156	156
SD005	F S	[3]	174	178	120	136	233	233	128	128	199	203	103	149	156	158
SD009	F S	[3]	174	184	124	124	231	233	128	134	197	199	103	137	156	165
SD012	F S	[3]	178	184	116	128	235	247	132	134	199	199	103	137	156	158
SD018	F S	[3]	174	178	120	124	233	247	128	134	199	199	103	151	156	165
SD019	F S	[3]	178	184	116	136	233	247	128	134	199	203	149	149	165	165
SD025	F S	[3]	174	178	116	136	233	233	126	128	197	199	103	149	156	158
SD026	F S	[3]	184	186	120	120	235	247	134	134	199	199	149	149	156	156
SD027	F S	[3]	176	184	126	126	233	235	134	134	199	199	137	149	158	165
SD028	F S	[3]	174	178	120	124	233	247	132	134	197	199	103	149	156	165
SD039	F S	[3]	176	178	126	128	233	233	128	138	199	199	149	151	156	158
SD041	F S	[3]	176	178	128	144	233	233	132	134	197	197	103	149	156	158
SD050	F S	[3]	154	170	116	128	247	247	132	134	197	199	103	149	156	156
SD051	F S	[3]	178	178	120	126	235	247	132	134	197	199	103	103	156	156
SD055	F S	[3]	174	174	128	128	247	249	132	138	199	203	103	149	156	156
SD061	F S	[3]	170	178	116	126	233	247	128	138	197	199	103	139	156	165
SD068	F S	[3]	184	184	126	126	235	235	128	134	197	199	149	149	156	165
SD094	F S	[3]	170	178	126	126	233	233	128	134	199	203	103	139	156	156
SD096	F S	[3]	174	178	116	120	233	247	128	128	199	199	149	149	156	156
SD099	F S	[3]	170	178	126	126	233	233	128	128	197	199	103	103	156	165
SD101	F S	[3]	170	178	116	120	233	247	128	134	197	199	103	149	156	165
SD103	F S	[3]	170	184	116	126	233	251	134	138	203	203	149	151	156	156
SD107	F S	[3]	184	186	120	124	233	235	132	134	197	203	139	149	156	158
11_E03	CH SW	.	174	174	126	144	233	233	128	132	199	201	149	149	156	165
20_G05	CH SW	.	174	184	116	120	247	251	128	132	199	199	149	149	158	165
23_M05	CH SW	.	174	174	124	126	233	235	128	132	197	199	103	139	156	158
24_O05	CH SW	.	178	184	120	124	233	249	134	138	199	199	149	149	156	156
56_O13	CH SW	.	170	174	128	144	233	249	128	136	197	197	103	149	156	156
69_I17	CH SW	.	174	184	116	140	247	249	132	138	197	199	103	103	156	158
70_K17	CH SW	.	176	176	126	136	235	247	128	138	199	199	103	103	156	156
72_O17	CH SW	.	170	184	116	128	247	247	128	136	197	197	149	149	156	156
75_E19	CH SW	.	174	178	120	126	247	249	128	138	199	199	103	103	156	156
89_A23	CH NW	.	174	188	126	128	233	247	128	128	199	199	103	103	156	156
90_C23	CH NW	.	184	184	124	128	233	249	128	128	197	199	103	139	156	156
99_F01	CH NW	.	174	184	116	128	235	249	128	138	199	199	149	149	156	158
100_H01	CH NW	.	170	174	126	128	233	233	128	138	199	199	103	149	156	165
2_C01	CH NW	.	170	176	116	120	235	247	128	138	199	199	103	149	156	156
27_E07	CH NW	.	170	184	116	120	235	249	128	132	199	199	149	151	156	165
28_G07	CH NW	.	170	170	126	128	247	247	132	134	197	197	103	151	156	156
29_I07	CH NW	.	184	194	142	148	235	249	128	132	199	203	103	149	156	156
30_K07	CH NW	.	170	170	120	126	251	251	132	132	197	199	149	151	156	156
32_O07	CH NW	.	170	178	128	150	233	247	128	132	197	203	103	149	156	156
33_A09	CH NW	.	170	174	120	126	233	247	128	128	199	199	149	151	156	165
36_G09	CH NW	.	170	170	116	128	233	247	128	128	197	199	151	151	156	158
38_K09	CH NW	.	170	174	120	128	247	249	128	134	197	199	103	149	156	156
39_M09	CH NW	.	170	174	124	126	233	249	128	128	199	199	149	149	156	156
40_O09	CH NW	.	170	170	124	126	247	249	132	138	199	201	103	151	156	156
41_A11	CH NW	.	170	170	126	128	233	249	134	138	197	199	103	103	156	165
42_C11	CH NW	.	170	170	120	128	233	233	132	138	199	199	149	151	156	156
43_E11	CH NW	.	170	170	116	128	233	233	128	138	199	199	149	149	156	156
44_G11	CH NW	.	170	174	116	126	249	249	128	132	199	199	149	149	156	156
45_I11	CH NW	.	170	174	126	128	233	249	132	138	197	199	149	149	156	156
46_K11	CH NW	.	174	174	116	126	233	233	134	138	197	199	149	149	156	156
48_O11	CH NW	.	170	174	116	116	233	233	134	134	197	197	149	149	156	156
5_I01	CH NW	.	170	170	120	128	235	235	128	132	199	199	151	151	156	165
50_C13	CH NW	.	170	170	116	116	249	249	132	142	197	199	149	149	156	156
51_E13	CH NW	.	170	170	120	124	233	247	128	138	197	197	149	151	156	165
54_K13	CH NW	.	170	170	124	126	249	249	132	138	199	199	103	149	156	158
55_M13	CH NW	.	174	176	116	124	247	247	128	138	199	199	103	149	156	156
61_I15	CH NW	.	170	170	116	126	233	249	134	138	197	199	103	149	156	156
64_O15	CH NW	.	170	174	116	128	233	233	128	136	199	199	149	149	156	156
65_A17	CH NW	.	170	170	116	126	233	249	132	134	199	199	103	139	156	156
67_E17	CH NW	.	170	176	120	126	233	249	128	132	199	199	103	149	156	156
80_O19	CH NW	.	174	176	126	126	235	247	128	138	199	199	103	149	156	156
81_A21	CH NW	.	174	174	120	126	247	249	128	138	199	199	103	103	156	156
82_C21	CH NW	.	174	176	126	126	247	249	138	138	199	199	103	103	156	156
86_K21	CH NW	.	174	180	126	134	233	251	128	128	197	197	103	103	156	165
87_M21	CH NW	.	170	174	116	120	233	233	128	138	199	199	149	151	156	156
88_O21	CH NW	.	170	206	134	142	233	235	128	134	197	197	103	103	156	165
91_E23	CH NW	.	170	170	116	120	235	235	128	128	199	199	149	151	156	165
92_G23	CH NW	.	170	170	128	128	233	247	132	134	197	197	149	149	156	156
93_I23	CH NW	.	170	170	124	128	233	247	132	138	197	199	149	149	156	165
95_M23	CH NW	.	174	176	126	126	235	249	138	138	199	199	103	103	156	156
96_O23	CH NW	.	170	170	126	128	233	233	128	138	199	199	103	149	156	165
97_B01	CH NW	.	170	184	116	116	249	249	132	132	199	199	149	149	156	156
31_M07	CH NW	.	176	178	126	126	247	249	138	138	199	199	103	103	156	156
37_I09	CH NW	.	174	176	120	126	235	249	128	138	199	199	103	149	156	156
47_M11	CH NW	.	178	186	126	126	233	247	128	128	197	197	103	137	156	156
53_I13	CH NW	.	174	176	120	136	235	249	128	128	199	199	103	149	156	156
59_E15	CH NW	.	174	178	118	142	233	249	128	132	195	199	103	153	156	165
57_A15	CH NW	.	174	174	120	128	233	235	128	140	199	199	103	149	156	156
58_C15	CH NW	.	184	184	130	144	233	247	132	138	199	199	103	151	156	156
60_G15	CH NW	.	174	188	120	130	247	251	128	132	199	199	149	149	156	156
62_K15	CH NW	.	174	176	126	126	247	249	128	138	199	199	103	149	156	156
63_M15	CH NW	.	176	176	136	136	235	247	128	128	199	199	103	103	156	156
66_C17	CH NW	.	174	174	126	126	233	233	134	134	197	199	103	149	156	156
68_G17	CH NW	.	174	176	120	136	235	249	128	128	199	199	103	103	156	156
71_M17	CH NW	.	176	178	120	136	235	249	128	128	199	199	103	149	156	156
73_A19	CH NW	.	176	178	120	126	247	247	128	138	199	199	103	103	156	156
74_C19	CH NW	.	184	214	120	126	233	233	128	138	197	199	149	149	156	165
76_G19	CH NW	.	174	214	126	128	233	233	128	128	197	199	103	149	156	156
77_I19	CH NW	.	170	178	116	120	235	235	128	134	197	199	149	149	165	165
79_M19	CH NW	.	168	192	118	120	233	245	132	132	197	201	149	149	156	156
94_K23	CH NW	.	170	178	126	126	233	235	128	132	199	199	149	149	165	165
98_D01	CH NW	.	174	184	124	128	233	247	128	134	197	199	103	149	158	165
SH159	CH NE	[1]	174	184	124	126	247	249	132	132	197	199	103	149	156	158
SH003	CH NE	[1]	174	174	126	128	247	247	128	128	197	201	103	103	158	158
SH137	CH NE	[1]	170	174	116	116	233	235	128	132	197	199	103	149	158	158
SH115	CH NE	[1]	174	174	124	126	247	247	128	132	197	199	103	103	158	158
SH135	CH NE	[1]	184	184	120	120	233	247	128	138	197	197	103	149	158	158
SH002	CH NE	[1]	174	184	120	122	247	247	128	132	197	199	103	103	158	174
SH001	CH NE	[1]	170	184	124	128	247	249	128	132	197	201	103	103	158	158
SH076	CH NE	[1]	174	184	120	126	247	249	132	138	197	199	103	103	158	174
SH114	CH NE	[1]	170	184	120	128	233	247	128	132	197	197	103	149	158	158
SH134	CH NE	[1]	174	178	116	120	233	251	128	128	201	201	103	149	158	158
SH123	CH NE	[1]	170	184	128	128	233	247	128	128	197	199	103	149	156	158
SH199	CH NE	[1]	174	184	120	122	247	247	128	132	199	201	103	149	165	174
SH124	CH NE	[1]	170	184	128	128	233	233	132	132	197	199	103	103	156	158
SH118	CH NE	[1]	170	184	128	128	235	247	128	132	197	199	103	149	158	158
SH119	CH NE	[1]	170	184	128	128	235	247	128	132	197	199	149	149	158	158
SH200	CH NE	[1]	170	174	128	128	233	249	132	132	197	199	103	103	158	158
SH117	CH NE	[1]	174	178	126	144	249	251	128	128	197	199	103	103	156	156
SH157	CH NE	[1]	174	184	128	128	233	249	128	132	199	199	103	149	156	158
SH154	CH NE	[1]	184	184	116	126	247	249	128	132	199	199	149	151	156	156
SH004	CH NE	[1]	170	170	126	128	233	235	132	132	197	199	103	149	158	158
SH168	CH NE	[1]	184	184	126	128	233	249	128	128	197	199	149	149	156	158
SH138	CH NE	[1]	174	178	126	128	233	251	128	132	197	199	103	149	156	156
SH167	CH NE	[1]	176	178	120	126	233	247	132	132	197	197	103	149	158	158
SH208	CH NE	[1]	170	174	126	128	233	233	128	132	199	199	103	149	156	156
SH153	CH NE	[1]	174	180	120	128	233	235	128	132	199	203	103	103	156	158
SH198	CH NE	[1]	184	184	122	128	233	251	128	132	199	199	103	103	156	158
SH190	CH NE	[1]	174	180	120	128	249	249	132	132	197	199	103	103	156	156
SH005	CH NE	[1]	174	174	120	128	249	249	128	128	199	199	139	149	156	158
SH189	CH NE	[1]	170	174	144	144	233	247	128	134	199	199	149	149	158	158
SH166	CH NE	[1]	170	174	122	144	247	251	128	132	197	199	103	149	158	158
SH097	CH NE	[1]	170	174	116	122	247	247	134	138	197	199	149	149	158	158
SH188	CH NE	[1]	174	174	116	122	247	249	134	138	197	199	139	149	158	158
SH163	CH NE	[1]	174	184	116	126	247	251	128	138	197	197	103	149	156	158
SH187	CH NE	[1]	174	174	120	120	247	251	128	132	197	199	103	103	156	165
SH164	CH NE	[1]	174	174	120	144	247	247	128	134	197	197	103	103	158	158
SH160	CH NE	[1]	174	186	128	144	233	247	134	134	199	199	103	149	156	165
SH186	CH NE	[1]	170	174	126	144	247	247	128	128	199	201	103	149	156	158
SH165	CH NE	[1]	170	170	122	122	233	247	128	134	197	199	103	149	158	158
SH162	CH NE	[1]	170	174	120	126	233	249	128	128	199	199	139	149	158	158
SH116	CH NE	[1]	170	174	126	144	247	249	128	134	197	199	149	149	158	158
SH006	CH NE	[1]	170	174	126	144	247	247	128	132	197	199	149	149	158	158
SH151	CH NE	[1]	170	184	116	128	233	247	128	128	199	201	149	149	158	158
SH095	CH NE	[1]	174	174	120	128	247	249	128	128	199	201	103	149	156	156
SH015	CH NE	[1]	170	174	144	144	247	247	128	134	199	199	149	149	156	165
SH014	CH NE	[1]	174	174	126	126	247	251	128	134	199	203	139	149	158	165
SH100	CH NE	[1]	170	184	126	144	233	249	132	138	199	199	149	149	156	158
SH112	CH NE	[1]	170	174	116	144	235	247	128	128	199	199	103	149	156	158
SH101	CH NE	[1]	170	174	120	144	233	247	128	134	199	199	103	149	156	158
SH103	CH NE	[1]	170	184	120	126	235	247	132	134	199	199	103	149	156	156
SH089	CH NE	[1]	170	184	120	144	233	233	128	128	199	201	103	149	158	165
SH139	CH NE	[1]	174	184	116	128	247	251	132	134	199	199	149	149	158	165
SH071	CH NE	[1]	170	174	120	126	233	249	128	128	199	199	103	139	156	158
SH072	CH NE	[1]	174	184	120	120	233	249	128	128	197	199	103	139	158	165
SH141	CH NE	[1]	174	174	128	128	249	251	128	128	199	199	103	149	156	156
SH094	CH NE	[1]	184	184	126	126	251	253	128	132	199	199	103	103	156	156
SH013	CH NE	[1]	170	174	116	116	247	247	128	132	197	199	103	149	156	165
SH156	CH NE	[1]	174	174	120	126	247	251	128	132	197	199	149	149	156	165
SH155	CH NE	[1]	174	174	116	128	247	249	128	132	199	199	139	149	156	165
SH098	CH NE	[1]	170	184	126	128	233	247	128	134	199	201	139	149	158	165
SH099	CH NE	[1]	174	174	120	146	233	249	128	134	199	199	139	149	156	158
SH087	CH NE	[1]	174	174	120	122	249	249	128	132	197	199	103	103	158	158
SH007	CH NE	[1]	174	174	126	140	233	251	128	128	199	199	103	103	156	165
SH009	CH NE	[1]	174	184	120	128	247	249	128	128	197	199	103	149	156	158
SH093	CH NE	[1]	174	174	128	140	233	249	128	128	199	199	103	149	156	156
SH088	CH NE	[1]	174	174	116	120	247	249	128	132	199	199	103	149	165	165
SH091	CH NE	[1]	174	174	120	128	247	249	128	132	199	199	103	149	158	165
SH068	CH NE	[1]	170	170	126	144	247	251	128	132	199	199	103	103	158	158
SH069	CH NE	[1]	174	174	116	128	233	247	132	132	199	199	103	103	156	158
SH152	CH NE	[1]	170	174	120	120	247	251	128	128	199	199	103	149	156	165
SH092	CH NE	[1]	174	184	116	126	247	251	132	132	199	199	149	149	156	165
SH070	CH NE	[1]	174	186	126	128	233	247	132	134	197	199	103	149	156	165
SH067	CH NE	[1]	170	174	126	128	233	251	128	132	199	203	103	139	158	165
SH105	CH NE	[1]	174	184	116	120	247	251	128	132	199	199	149	149	158	165
SH065	CH NE	[1]	174	184	126	128	247	251	132	134	199	199	149	149	156	158
SH073	CH NE	[1]	174	184	116	144	247	251	128	132	197	199	103	149	158	165
SH110	CH NE	[1]	174	184	116	128	247	247	132	134	197	199	149	149	156	165
SH109	CH NE	[1]	170	184	120	120	247	251	128	134	199	199	149	149	158	165
SH148	CH NE	[1]	174	174	120	128	247	247	128	134	199	199	149	149	158	158
SH108	CH NE	[1]	174	174	116	120	233	247	132	134	197	201	103	103	158	165
SH064	CH NE	[1]	174	184	120	128	247	247	128	128	197	199	103	149	158	158
SH086	CH NE	[1]	174	174	120	128	249	251	128	132	199	199	103	149	156	165
SH063	CH NE	[1]	174	184	126	144	235	247	128	128	197	201	149	149	156	158
SH062	CH NE	[1]	170	174	116	116	235	251	128	132	197	199	103	149	165	165
SH061	CH NE	[1]	174	174	116	120	247	251	128	132	199	199	149	149	156	158
SH034	CH NE	[1]	170	174	128	128	247	249	128	134	197	197	149	149	156	158
SH033	CH NE	[1]	170	174	128	144	247	249	128	134	197	197	149	149	156	158
SH032	CH NE	[1]	174	184	126	144	247	247	128	132	197	199	147	149	156	156
SH035	CH NE	[1]	170	174	126	128	247	251	132	134	197	199	149	149	156	165
SH036	CH NE	[1]	174	174	120	144	233	233	128	128	197	197	149	149	156	156
SH150	CH NE	[1]	174	184	126	126	233	247	128	128	197	197	103	103	158	165
SH031	CH NE	[1]	174	174	122	126	247	249	128	132	197	199	149	151	156	156
SH060	CH NE	[1]	174	184	128	128	233	247	134	138	197	199	103	149	156	165
SH147	CH NE	[1]	170	174	116	126	233	249	128	132	197	199	103	149	156	158
SH085	CH NE	[1]	174	174	120	126	249	251	128	132	197	199	149	149	156	165
SH055	CH NE	[1]	174	174	128	128	247	251	128	128	197	201	149	149	156	158
SH056	CH NE	[1]	170	174	128	128	247	249	128	138	197	199	103	103	158	165
SH057	CH NE	[1]	174	184	116	128	247	251	128	132	197	199	103	149	158	165
SH053	CH NE	[1]	174	184	120	126	247	251	128	132	197	199	103	149	156	165
SH146	CH NE	[1]	174	174	126	128	233	249	128	128	197	199	103	139	158	158
SH058	CH NE	[1]	170	184	120	144	247	249	128	134	197	199	103	103	158	165
SH090	CH NE	[1]	174	184	126	128	247	251	128	128	197	199	103	149	165	165
SH161	CH NE	[1]	174	174	116	128	247	249	128	132	197	199	103	149	156	165
SH054	CH NE	[1]	174	184	126	126	233	249	128	128	197	201	103	149	156	158
SH185	CH NE	[1]	184	184	126	126	247	247	132	132	199	199	149	149	156	156
SH030	CH NE	[1]	174	174	126	128	249	251	128	128	197	199	139	149	165	165
SH038	CH NE	[1]	174	184	126	126	233	247	128	132	197	199	149	149	156	156
SH077	CH NE	[1]	170	174	126	128	249	249	128	128	197	199	103	103	156	158
SH145	CH NE	[1]	170	184	128	142	233	249	128	134	197	201	103	103	158	158
SH029	CH NE	[1]	174	174	120	126	247	247	128	132	199	199	103	103	156	158
SH079	CH NE	[1]	174	184	128	130	233	233	128	134	199	199	149	149	156	165
SH051	CH NE	[1]	174	184	126	144	247	251	128	128	197	201	103	149	156	158
SH050	CH NE	[1]	174	174	128	144	249	251	128	128	197	199	149	149	156	165
SH028	CH NE	[1]	170	174	126	128	247	247	128	128	197	199	103	149	158	165
SH183	CH NE	[1]	184	186	120	126	247	247	128	132	199	199	103	103	165	165
SH182	CH NE	[1]	174	184	116	126	247	247	128	132	199	201	103	103	158	158
SH012	CH NE	[1]	170	182	120	128	233	247	128	128	197	201	149	149	156	158
SH039	CH NE	[1]	174	174	128	128	249	249	134	138	199	199	103	149	156	156
SH025	CH NE	[1]	170	174	126	128	247	249	128	132	199	199	103	103	158	158
SH184	CH NE	[1]	170	170	128	142	233	247	128	134	197	197	149	149	158	158
SH181	CH NE	[1]	184	184	130	144	233	233	128	134	199	199	103	149	156	156
SH180	CH NE	[1]	174	174	126	128	233	249	128	128	197	199	103	149	156	158
SH040	CH NE	[1]	174	174	126	128	251	251	128	128	197	199	103	103	156	158
SH041	CH NE	[1]	170	174	126	130	247	247	128	134	197	197	103	149	158	158
SH023	CH NE	[1]	174	174	126	126	247	247	128	132	199	199	103	103	156	158
SH149	CH NE	[1]	174	184	128	128	247	249	132	134	199	199	149	149	156	158
SH022	CH NE	[1]	174	174	126	128	247	247	128	128	197	199	103	149	158	158
SH024	CH NE	[1]	174	184	116	126	247	249	132	132	199	199	139	149	156	156
SH083	CH NE	[1]	174	174	126	128	233	233	128	132	197	199	103	149	156	158
SH045	CH NE	[1]	174	174	120	128	233	251	132	132	197	197	103	149	156	158
SH194	CH NE	[1]	174	184	116	128	247	251	128	132	197	197	139	149	158	165
SH195	CH NE	[1]	174	184	120	126	247	251	128	138	197	199	103	149	156	156
SH084	CH NE	[1]	174	174	128	128	249	251	132	134	199	199	103	149	158	158
SH042	CH NE	[1]	174	174	116	128	233	249	128	132	199	199	149	149	156	156
SH143	CH NE	[1]	174	184	120	126	249	251	128	138	197	197	103	139	158	165
SH043	CH NE	[1]	174	174	128	128	249	251	128	128	199	199	103	149	156	158
SH019	CH NE	[1]	174	174	126	142	247	247	132	134	197	199	103	149	158	158
SH020	CH NE	[1]	174	174	120	128	233	251	128	128	199	199	103	149	158	158
SH021	CH NE	[1]	174	184	126	128	247	249	128	128	197	199	103	103	158	165
SH193	CH NE	[1]	174	184	126	126	233	247	128	132	199	199	103	139	156	158
SH018	CH NE	[1]	174	174	120	128	247	251	128	138	199	199	103	149	156	156
SH017	CH NE	[1]	174	174	116	128	233	249	128	132	197	199	103	149	158	158
SH192	CH NE	[1]	174	174	116	120	247	249	132	138	197	199	149	149	156	156
SH106	CH NE	[1]	174	174	128	144	249	249	128	128	197	199	149	149	158	158
SH016	CH NE	[1]	170	174	128	128	249	251	128	132	197	199	103	103	158	158
SH142	CH NE	[1]	174	174	126	142	247	249	128	134	199	201	103	103	158	158
SH047	CH NE	[1]	174	184	120	126	247	247	128	128	197	199	149	149	158	158
SH046	CH NE	[1]	174	174	120	128	249	251	128	138	197	199	147	149	156	156
SH049	CH NE	[1]	174	174	120	120	233	249	128	138	197	197	149	149	156	156
SH048	CH NE	[1]	170	174	128	128	247	247	128	128	197	197	103	149	158	165
SH082	CH NE	[1]	174	184	128	142	233	249	132	134	197	197	103	149	158	158
SH080	CH NE	[1]	170	174	128	144	247	249	128	128	197	201	149	149	156	158
SH081	CH NE	[1]	174	184	126	126	247	251	128	132	197	199	103	149	158	158
Elba1	IT Elba	[3]	174	214	128	128	233	233	132	138	199	199	141	151	156	156
Elba2	IT Elba	[3]	178	214	120	128	233	233	128	132	199	199	149	149	156	156
Elba3	IT Elba	[3]	178	214	128	128	0	0	132	132	197	199	103	149	156	156
Elba4	IT Elba	[3]	174	174	120	128	233	235	132	132	197	199	149	153	156	156
Elba5	IT Elba	[3]	174	174	126	136	233	233	132	134	0	0	151	151	156	156
Elba7	IT Elba	[3]	0	0	120	128	233	249	132	132	197	199	149	151	156	156
Elba8	IT Elba	[3]	0	0	120	128	233	233	128	132	199	199	149	151	156	156
Elba9	IT Elba	[3]	200	200	0	0	233	249	128	132	199	199	151	151	156	156
Elba10	IT Elba	[3]	0	0	128	128	233	233	132	132	197	199	137	151	156	156
Elba11	IT Elba	[3]	174	174	128	128	235	249	128	132	199	199	149	153	156	156
Ghis_1	F Corsica	[3]	174	174	120	126	233	249	132	136	197	197	103	149	156	156
Ghis_2	F Corsica	[3]	178	184	120	126	233	249	138	138	197	199	137	149	156	165
Ghis_3	F Corsica	[3]	178	196	116	126	233	249	128	138	199	203	103	149	156	165
Ghis_4	F Corsica	[3]	178	178	120	120	235	249	136	138	197	199	103	149	156	156
Ghis_5	F Corsica	[3]	186	186	120	130	233	249	128	136	197	199	149	149	156	156
Luri_6	F Corsica	[3]	186	194	116	126	233	247	128	132	197	201	103	149	156	156
Luri_7	F Corsica	[3]	194	194	116	126	233	233	138	138	195	197	103	103	156	156
Luri_8	F Corsica	[3]	0	0	116	126	233	233	128	128	197	201	103	139	156	156
Luri_9	F Corsica	[3]	192	194	116	116	233	233	128	138	195	203	103	103	156	156
Luri_10	F Corsica	[3]	174	198	116	116	235	235	138	138	197	203	103	139	156	156
Venzo_11	F Corsica	[3]	174	186	126	142	233	233	132	132	197	197	149	149	156	156
Venzo_12	F Corsica	[3]	178	186	116	120	233	235	128	138	197	199	103	103	156	156
Venzo_13	F Corsica	[3]	170	170	118	126	233	239	136	138	199	199	103	149	156	156
Venzo_14	F Corsica	[3]	178	194	0	0	233	235	138	138	197	199	103	103	156	156
Venzo_15	F Corsica	[3]	182	186	116	116	235	235	128	138	203	203	103	149	156	156
Luisa1	IT N	[3]	174	184	120	130	235	235	128	138	199	199	139	149	156	156
Luisa10	IT N	[3]	174	182	126	128	233	235	128	134	203	203	139	149	156	156
Luisa11	IT N	[3]	182	206	122	126	233	233	128	132	199	199	103	149	156	156
Luisa12	IT N	[3]	174	182	126	130	235	247	136	138	199	199	149	149	156	156
Luisa13	IT N	[3]	170	174	120	126	233	249	132	136	199	203	103	149	156	156
Luisa14	IT N	[3]	184	196	128	142	233	247	132	138	199	199	103	149	156	156
Luisa3	IT N	[3]	170	174	122	128	249	249	130	136	197	201	103	149	156	156
Luisa4	IT N	[3]	174	178	120	128	233	233	132	134	199	199	149	149	156	156
Luisa5	IT N	[3]	170	174	128	142	233	249	128	134	199	199	103	149	156	156
Luisa6	IT N	[3]	170	174	128	142	235	235	128	136	197	199	149	149	156	156
Luisa7	IT N	[3]	178	178	136	138	233	247	128	132	197	203	103	103	156	156
Luisa8	IT N	[3]	174	184	126	128	247	249	128	150	199	199	139	149	156	156
Luisa9	IT N	[3]	154	186	120	144	235	247	132	134	197	199	149	149	156	156
Slo11	SLO	[3]	174	196	126	128	233	235	128	128	197	197	149	149	156	156
Slo18	SLO	[3]	170	184	128	130	233	247	128	128	199	203	103	149	156	158
Slo19	SLO	[3]	174	174	120	128	233	233	128	128	197	199	103	153	154	156
Slo9	SLO	[3]	174	184	120	124	233	233	128	128	197	199	103	149	156	156
Slovenia2	SLO	[3]	170	184	126	128	233	247	128	128	199	203	103	149	156	158
Slovenia5	SLO	[3]	174	184	124	128	235	249	128	138	197	203	149	149	156	156
DB1SLO25	SLO	[3]	170	184	126	128	233	247	128	128	0	0	103	149	156	158
DB2SLO30	SLO	[3]	184	196	124	128	233	233	128	128	197	203	103	149	156	156
Wien1	AT E1	[3]	170	194	120	128	233	233	128	138	199	203	149	149	156	156
Wien2	AT E1	[3]	170	174	128	130	233	233	128	138	199	203	139	151	156	156
Burg	AT E1	[3]	168	194	126	128	233	233	128	128	203	205	149	151	154	156
AT11	AT E1	[3]	194	196	120	128	233	233	128	138	203	203	139	149	156	156
AT12	AT E1	[3]	174	174	126	134	233	233	128	138	197	199	139	149	156	165
AT13	AT E1	[3]	178	196	118	128	233	233	128	132	199	199	149	149	156	156
AT17	AT E1	[3]	194	196	118	120	233	233	128	138	199	203	139	149	156	158
AT19	AT E1	[3]	170	196	126	128	233	233	128	134	199	203	149	149	156	156
AT27	AT E1	[3]	170	174	126	126	233	233	134	138	199	203	149	151	154	156
AT3	AT E1	[3]	170	196	128	132	233	233	128	138	199	199	139	139	156	156
AT42	AT E1	[3]	170	174	128	128	233	233	128	134	203	203	149	149	156	156
AT7	AT E1	[3]	170	170	120	128	233	249	128	138	199	199	103	149	156	156
AT8	AT E1	[3]	170	174	116	120	233	233	128	138	199	199	149	149	156	156
AT80	AT E1	[3]	170	196	120	128	233	235	128	138	203	203	103	149	156	156
AT82	AT E1	[3]	174	176	118	126	233	233	134	138	203	203	149	149	156	156
AT83	AT E1	[3]	170	170	118	126	233	233	134	138	203	203	149	149	156	158
AT92	AT E1	[3]	170	174	118	126	233	233	128	134	0	0	103	103	156	156
AT93	AT E1	[3]	170	174	118	126	233	233	128	134	197	203	103	139	156	156
AT94	AT E1	[3]	194	196	118	128	249	249	128	134	203	203	149	149	156	165
HL_1	AT E2	[3]	170	194	128	134	249	249	128	138	199	203	139	149	156	156
HL_3	AT E2	[3]	174	194	128	128	233	233	132	138	199	203	153	153	156	165
HL_4	AT E2	[3]	178	194	116	128	233	233	136	138	203	203	149	153	165	165
HL_5	AT E2	[3]	174	194	116	118	233	233	128	140	199	203	149	149	156	165
HL_6	AT E2	[3]	174	194	128	134	231	233	128	134	203	203	149	149	156	165
HL_7	AT E2	[3]	174	194	128	128	233	233	128	134	199	203	149	149	156	165
HL_8	AT E2	[3]	168	174	118	128	235	235	128	138	199	203	139	149	156	156
HL_9	AT E2	[3]	174	196	120	134	233	235	132	138	197	203	139	149	156	165
HL_10	AT E2	[3]	170	174	128	128	233	235	130	140	199	203	149	149	156	156
HL_12	AT E2	[3]	170	174	116	128	233	233	132	138	199	203	139	153	156	165
HL_13	AT E2	[3]	170	174	118	134	233	233	128	128	199	203	149	153	156	165
HL_14	AT E2	[3]	174	174	128	134	233	249	128	136	199	203	149	149	0	0
HL_15	AT E2	[3]	170	174	118	134	233	249	128	128	203	203	149	149	156	156
HL_16	AT E2	[3]	170	174	116	128	233	233	128	132	199	203	139	149	156	165
HL_18	AT E2	[3]	170	174	120	134	233	233	134	138	203	203	149	149	156	165
HL_19	AT E2	[3]	168	174	124	128	233	249	128	128	199	203	139	149	156	156
HL_20	AT E2	[3]	174	174	120	134	233	249	132	132	203	203	149	149	156	156
HL_21	AT E2	[3]	174	194	128	128	233	233	128	134	203	203	139	151	156	156
HL_22	AT E2	[3]	170	174	128	128	233	233	128	134	199	203	149	149	156	165
HL_23	AT E2	[3]	174	196	128	128	233	233	128	136	199	203	149	149	156	156
HL_24	AT E2	[3]	174	174	128	128	233	233	128	128	199	203	149	149	156	156
HL_25	AT E2	[3]	174	174	134	134	233	233	128	132	199	203	149	149	165	165
HL_26	AT E2	[3]	170	174	120	126	233	233	128	132	199	203	139	149	156	156
HL_27	AT E2	[3]	174	194	118	134	0	0	132	138	203	203	137	149	156	156
HL_28	AT E2	[3]	168	170	128	128	233	249	136	138	197	203	149	149	156	156
HL_29	AT E2	[3]	174	196	120	120	233	233	128	138	199	205	149	149	154	156
HL_30	AT E2	[3]	170	176	128	128	233	247	136	138	203	203	149	151	156	156
HL_31	AT E2	[3]	170	174	120	128	233	247	132	138	203	203	149	149	156	156
HL_32	AT E2	[3]	194	194	128	134	233	233	138	138	199	203	149	151	156	158
HL_33	AT E2	[3]	194	194	118	134	233	233	128	128	199	203	137	149	156	165
HL_35	AT E2	[3]	170	170	128	128	233	233	0	0	197	203	149	149	156	156
HL_36	AT E2	[3]	0	0	118	118	233	247	128	132	199	203	149	149	156	158
HL_37	AT E2	[3]	174	194	118	128	233	235	128	138	199	203	149	149	156	156
HL_38	AT E2	[3]	170	196	120	128	233	233	128	128	199	203	151	153	156	165
HL_39	AT E2	[3]	174	194	134	134	233	249	128	128	197	203	139	151	156	156
HL_40	AT E2	[3]	174	174	120	124	233	235	134	138	197	203	149	151	156	165
HL_41	AT E2	[3]	174	174	0	0	233	235	128	128	199	203	149	149	156	165
Merk_1	AT E3	[3]	170	170	118	120	233	233	138	138	199	203	149	149	156	165
Merk_2	AT E3	[3]	170	174	0	0	233	233	138	138	203	203	103	149	156	156
Merk_3	AT E3	[3]	170	194	120	120	233	235	138	138	197	197	149	149	156	156
Merk_4	AT E3	[3]	170	174	118	120	233	235	130	138	203	205	149	149	156	156
Merk_5	AT E3	[3]	174	174	120	130	233	233	138	138	199	203	149	149	156	158
Merk_6	AT E3	[3]	174	194	122	130	0	0	128	128	203	205	139	139	156	156
Merk_7	AT E3	[3]	174	174	122	122	233	233	128	138	199	203	0	0	156	165
Merk_8	AT E3	[3]	170	174	122	128	233	233	128	134	203	205	149	149	156	156
Merk_9	AT E3	[3]	170	170	120	130	233	233	128	128	197	199	139	149	156	165
Merk_10	AT E3	[3]	170	194	120	122	233	249	138	138	199	203	103	149	156	158
Merk_11	AT E3	[3]	170	174	122	128	233	235	128	138	199	199	149	153	156	156
Merk_12	AT E3	[3]	170	194	122	130	233	233	128	138	203	203	149	149	165	165
Merk_13	AT E3	[3]	170	174	122	130	233	233	128	138	203	211	139	149	165	165
Merk_14	AT E3	[3]	174	174	130	130	233	233	138	138	197	203	149	149	154	156
Merk_15	AT E3	[3]	170	194	118	130	233	235	128	138	201	203	139	151	156	156
Merk_16	AT E3	[3]	174	194	120	136	233	233	128	138	199	211	149	149	156	165
Merk_17	AT E3	[3]	170	174	130	130	233	233	132	138	199	203	149	149	156	156
Merk_20	AT E3	[3]	196	196	128	130	249	249	128	138	197	199	139	149	156	156
Merk_21	AT E3	[3]	170	174	120	130	233	235	128	132	203	203	149	149	156	156
Merk_22	AT E3	[3]	168	170	120	130	233	249	0	0	203	203	149	149	156	165
Merk_23	AT E3	[3]	174	174	122	122	233	247	128	138	197	203	149	149	156	165
Merk_25	AT E3	[3]	170	174	130	130	233	233	138	138	203	211	149	149	156	156
Merk_26	AT E3	[3]	0	0	118	128	233	249	130	138	199	199	149	149	154	156
Merk_27	AT E3	[3]	170	174	120	130	235	247	138	138	201	203	149	149	156	165
Merk_28	AT E3	[3]	170	174	120	120	233	249	128	138	203	205	149	149	156	156
Merk_29	AT E3	[3]	174	174	122	130	233	233	128	128	197	203	149	149	154	156
Merk_30	AT E3	[3]	174	176	122	128	233	233	128	138	199	203	149	149	156	156
Merk_31	AT E3	[3]	170	170	120	128	233	249	132	138	199	203	137	149	154	156
Merk_32	AT E3	[3]	170	174	120	120	233	233	138	138	197	199	149	149	156	156
Merk_33	AT E3	[3]	170	170	120	134	233	233	138	138	199	203	137	139	165	165
Merk_34	AT E3	[3]	170	176	128	130	233	233	128	128	199	203	139	149	156	156
Merk_35	AT E3	[3]	170	170	120	136	233	233	138	138	199	205	139	149	156	156
Merk_36	AT E3	[3]	170	174	120	120	233	233	138	138	197	203	149	149	156	158
Merk_37	AT E3	[3]	0	0	120	130	233	235	128	138	199	203	149	149	156	165
Merk_38	AT E3	[3]	174	174	122	128	233	233	138	138	203	203	149	153	156	156
Merk_39	AT E3	[3]	174	174	120	122	233	233	128	138	197	203	103	149	156	156
Merk_40	AT E3	[3]	170	174	120	136	233	233	138	138	203	205	149	149	156	156
Merk_41	AT E3	[3]	174	194	122	128	233	233	128	138	199	199	149	149	156	165
Merk_42	AT E3	[3]	170	170	120	136	233	233	128	128	199	203	149	149	156	156
Merk_43	AT E3	[3]	174	194	122	130	233	233	128	138	199	199	149	149	158	165
Merk_44	AT E3	[3]	174	174	122	130	233	249	132	138	199	211	149	149	156	165
Merk_45	AT E3	[3]	170	194	122	130	233	235	128	128	203	203	149	151	156	156
Merk_46	AT E3	[3]	170	170	120	128	233	249	132	132	203	203	139	149	156	165
Cro1-1	HR	[3]	174	184	126	134	233	247	128	138	197	199	139	153	156	156
Cro1-10	HR	[3]	174	184	126	136	233	249	128	128	197	197	103	139	156	156
Cro1-11	HR	[3]	174	186	116	128	247	249	128	138	199	203	103	107	156	156
Cro1-12	HR	[3]	174	186	126	134	233	249	128	128	197	199	103	103	156	156
Cro1-13	HR	[3]	174	174	126	134	233	249	128	130	197	197	139	149	156	156
Cro1-14	HR	[3]	174	174	126	134	233	233	128	138	197	205	103	103	154	156
Cro1-15	HR	[3]	174	174	116	128	233	247	128	128	199	203	103	153	156	156
Cro1-16	HR	[3]	174	174	126	128	233	247	128	128	197	199	103	149	156	165
Cro1-17	HR	[3]	174	174	134	134	247	247	128	128	199	205	0	0	156	156
Cro1-18	HR	[3]	174	186	126	126	233	247	0	0	203	209	103	139	156	156
Cro1-2	HR	[3]	174	192	116	120	233	249	128	138	199	199	103	139	156	156
Cro1-3	HR	[3]	174	174	126	128	233	247	128	128	197	199	141	141	156	156
Cro1-4	HR	[3]	174	174	116	126	249	249	128	132	199	205	141	149	156	156
Cro1-5	HR	[3]	174	174	128	134	233	247	128	138	197	199	103	149	156	156
Cro1-6	HR	[3]	174	186	118	126	233	249	128	138	197	197	103	103	156	156
Cro1-7	HR	[3]	174	174	116	134	233	249	128	130	197	209	103	149	156	156
Cro1-8	HR	[3]	174	184	116	126	0	0	128	128	199	203	103	153	156	156
Cro10	HR	[3]	174	174	116	116	233	247	128	128	197	199	103	139	156	156
Valjevo1	BIH	[3]	192	196	128	130	233	249	128	130	203	205	103	151	156	156
Valjevo2	BIH	[3]	174	196	118	122	233	233	128	128	197	199	151	153	156	158
Valjevo10	BIH	[3]	176	196	120	128	233	249	134	134	0	0	149	151	156	156
Valjevo3	BIH	[3]	174	196	116	130	233	249	130	138	203	203	103	151	156	165
Valjevo5	BIH	[3]	174	198	126	138	233	233	128	128	197	199	103	151	156	165
Valjevo7	BIH	[3]	174	196	122	126	233	233	128	138	199	203	103	153	156	165
Valjevo9	BIH	[3]	194	196	122	128	233	249	128	128	201	203	151	153	156	156
Gorazde10	BIH	[3]	174	190	120	130	233	233	132	134	197	199	103	153	156	156
Gorazde11	BIH	[3]	174	182	120	120	233	233	128	128	197	199	103	149	156	156
Gorazde5	BIH	[3]	174	196	120	134	233	235	128	134	199	205	103	149	156	156
Gorazde8	BIH	[3]	174	174	120	128	235	249	128	128	199	199	103	151	156	156
Gorazde1	BIH	[3]	174	174	104	104	235	247	128	128	205	205	103	151	156	156
Gorazde2	BIH	[3]	194	194	104	142	233	233	128	128	199	199	103	151	156	156
Gorazde4	BIH	[3]	174	174	128	130	233	235	128	128	199	201	149	153	156	156
Gorazde6	BIH	[3]	174	174	126	128	233	233	0	0	199	199	103	149	156	156
Gorazde7	BIH	[3]	174	182	104	120	233	249	128	134	205	205	103	153	156	158
Gorazde9	BIH	[3]	192	194	104	130	233	249	128	132	199	201	103	149	156	156
Bor1	SRB	[3]	174	196	126	134	233	235	132	140	199	199	0	0	156	156
Bor2	SRB	[3]	170	196	120	128	233	233	128	128	199	205	149	153	156	156
Bor3	SRB	[3]	174	174	118	128	233	233	128	140	199	201	153	155	156	156
Bor4	SRB	[3]	190	194	116	134	233	233	126	128	201	205	153	155	156	156
Bor7	SRB	[3]	0	0	116	126	233	233	128	138	197	205	103	153	156	156
Bor9	SRB	[3]	190	202	104	118	233	233	132	132	205	205	153	153	156	165
Belo_1	BG W	*	0	0	120	128	233	249	132	140	197	205	103	147	156	165
Belo_5	BG W	*	176	194	120	128	233	249	132	140	197	205	103	147	156	165
Belo_6	BG W	*	168	186	128	144	235	247	130	134	203	205	103	151	156	156
Petr_1	BG W	*	176	196	128	148	233	247	132	132	205	207	147	151	156	156
Petr_2	BG W	*	170	186	118	128	233	233	126	126	199	205	151	151	156	156
Petr_3	BG W	*	176	188	104	138	233	249	128	138	199	199	103	103	156	156
Petr_4	BG W	*	174	184	134	148	233	249	128	132	201	201	103	151	156	156
Blag_2	BG W	*	0	0	130	132	233	235	128	132	199	199	151	151	156	156
Blag_3	BG W	*	190	200	114	148	235	249	128	130	199	205	151	151	156	156
Blag_4	BG W	*	190	200	114	148	235	249	128	130	197	207	151	151	156	156
Blag_5	BG W	*	190	200	114	148	235	249	128	130	205	207	151	151	156	156
Blag_6	BG W	*	196	200	128	130	235	247	128	128	199	205	149	151	156	156
Blag_7	BG W	*	174	200	104	148	233	235	126	128	199	199	147	151	156	156
Blag_8	BG W	*	190	200	114	148	235	249	128	130	201	201	151	151	156	156
Blag_9	BG W	*	190	200	114	148	235	249	128	130	0	0	151	151	156	156
Blag_10	BG W	*	190	200	114	148	235	249	128	130	205	205	151	151	156	156
Blag_11	BG W	*	170	190	128	130	233	235	126	128	199	205	149	151	156	156
Blag_12	BG W	*	174	190	128	134	233	233	128	140	199	199	151	151	156	156
Blag_13	BG W	*	0	0	114	148	235	249	128	130	205	205	151	151	156	156
Blag_15	BG W	*	196	200	128	130	235	247	128	128	197	199	149	151	156	156
Blag_16	BG W	*	190	196	0	0	233	233	128	128	197	197	151	151	156	156
Kres_1	BG W	*	170	174	0	0	233	233	132	132	199	205	135	151	156	156
Kres_2	BG W	*	174	174	120	132	233	237	126	128	199	205	151	153	156	156
Kres_3	BG W	*	0	0	126	136	249	249	132	134	197	207	151	153	156	156
Kres_4	BG W	*	170	174	120	132	233	233	132	132	199	205	137	153	156	156
Bul_1	BG SE	[3]	170	184	124	124	233	247	130	132	197	203	149	153	156	156
Bul_3	BG SE	[3]	166	166	128	130	235	249	132	132	197	199	153	157	156	156
Bul_4	BG SE	[3]	176	184	128	134	233	233	126	138	199	199	151	157	156	156
Bul_6	BG SE	[3]	170	184	128	128	233	233	132	138	199	205	149	153	156	156
Bul_7	BG SE	[3]	170	198	128	132	233	251	128	132	195	205	149	157	156	156
Bul_8	BG SE	[3]	170	186	116	130	233	233	128	132	199	205	103	153	156	156
Bul_9	BG SE	[3]	170	176	128	128	0	0	132	138	195	199	151	153	156	156
Bul_10	BG SE	[3]	180	180	0	0	233	235	128	128	197	197	149	151	156	156
Bul_11	BG SE	[3]	170	170	0	0	233	233	128	128	197	205	153	153	156	165
Bul_12	BG SE	[3]	170	184	128	134	233	233	130	132	197	205	151	153	156	165
Bul_13	BG SE	[3]	170	174	116	130	233	247	128	132	199	201	151	157	156	165
Bul_14	BG SE	[3]	170	174	118	126	233	233	0	0	199	205	149	149	156	156
Bul_15	BG SE	[3]	170	170	118	118	233	251	132	132	197	197	149	151	156	156
Bul_16	BG SE	[3]	190	192	118	118	233	233	138	138	197	203	149	151	156	156
Bul_17	BG SE	[3]	170	170	116	128	233	233	128	128	203	205	149	151	156	156
Bul_20	BG SE	[3]	168	170	116	134	233	233	128	128	197	199	149	153	156	165
