# Supplementary material for: Cryptic population structure at the northern range margin of the service tree Sorbus domestica
Source: PeerJ. 2022 Dec 5;10:e14397. doi: 10.7717/peerj.14397 (PMC9745788; doi:10.7717/peerj.14397)
Supplement: Table S4 — Significant p-values after Bonferroni-correction of alpha (0.05/171 = 0.0003) are highlighted in bold. The full names of localities are presented in Table 2. [file peerj-10-14397-s004.xlsx]

## Sheet: Blatt1
Table S4: Pairwise Fst values (lower left of diagonal) between sampling localities (populations) and their probability, p based on 9999 permutations (upper right of diagonal). Significant p-values after Bonferroni-correction of alpha (0.05/171 = 0.0003) are highlighted in bold. The full names of localities are presented in Table 2.
	GB	F NW	F C	F S	CH SW	CH NW	CH NE	IT Elba	F Corsica	IT N	SLO	AT E1	AT E2	AT E3	HR	BIH	SRB	BG W	BG SE
GB	.	0.0037	0.0014	0.0002	0.2423	0.0018	0.0002	0.0001	0.0003	0.0004	0.0002	0.0001	0.0001	0.0001	0.0001	0.0001	0.0019	0.0002	0.0001
F NW	0.059321	.	0.0015	0.0001	0.1067	0.0011	0.0001	0.0001	0.0001	0.0001	0.0001	0.0001	0.0001	0.0001	0.0001	0.0001	0.0002	0.0001	0.0001
F C	0.055733	0.027803	.	0.0001	0.0077	0.0001	0.0001	0.0001	0.0001	0.0001	0.0001	0.0001	0.0001	0.0001	0.0001	0.0001	0.0001	0.0001	0.0001
F S	0.074261	0.068399	0.053367	.	0.2862	0.0002	0.0001	0.0001	0.0001	0.0034	0.0001	0.0001	0.0001	0.0001	0.0001	0.0001	0.0001	0.0001	0.0001
CH SW	0.013879	0.018925	0.035633	0.005933	.	0.5567	0.0574	0.0001	0.018	0.3634	0.0136	0.0001	0.0001	0.0001	0.0004	0.0001	0.0008	0.0001	0.0002
CH NW	0.068554	0.031452	0.035683	0.032487	-0.003628	.	0.0001	0.0001	0.0001	0.0335	0.0004	0.0001	0.0001	0.0001	0.0001	0.0001	0.0001	0.0001	0.0001
CH NE	0.080758	0.070359	0.105433	0.07668	0.019168	0.082997	.	0.0001	0.0001	0.0001	0.0001	0.0001	0.0001	0.0001	0.0001	0.0001	0.0001	0.0001	0.0001
IT Elba	0.214547	0.232119	0.215067	0.133165	0.127992	0.119254	0.181238	.	0.0001	0.0001	0.0001	0.0001	0.0001	0.0001	0.0001	0.0001	0.0002	0.0001	0.0001
F Corsica	0.100389	0.115737	0.101775	0.062962	0.043414	0.068471	0.161834	0.189725	.	0.0005	0.0002	0.0001	0.0001	0.0001	0.0001	0.0001	0.0004	0.0001	0.0001
IT N	0.08867	0.087941	0.087269	0.035126	0.003634	0.019905	0.10021	0.091731	0.069861	.	0.0001	0.0001	0.0001	0.0001	0.0001	0.0001	0.0003	0.0001	0.0001
SLO	0.154715	0.134993	0.132874	0.074418	0.058198	0.081431	0.090165	0.211646	0.119614	0.089941	.	0.0001	0.0001	0.0001	0.0001	0.0002	0.0006	0.0001	0.0001
AT E1	0.224256	0.185508	0.171975	0.091355	0.12402	0.09828	0.183096	0.177566	0.11523	0.08677	0.090514	.	0.001	0.0001	0.0001	0.0001	0.0001	0.0001	0.0001
AT E2	0.228806	0.207221	0.221508	0.114673	0.126543	0.127258	0.169568	0.152837	0.148337	0.095925	0.099729	0.028776	.	0.0001	0.0001	0.0001	0.0001	0.0001	0.0001
AT E3	0.253302	0.20627	0.221938	0.131994	0.134371	0.127125	0.192335	0.211243	0.134224	0.113795	0.137682	0.047568	0.052453	.	0.0001	0.0001	0.0001	0.0001	0.0001
HR	0.102035	0.120456	0.124966	0.121261	0.058529	0.096792	0.116283	0.214505	0.107213	0.111592	0.097188	0.171181	0.166037	0.203508	.	0.0001	0.0001	0.0001	0.0001
BIH	0.136252	0.120799	0.112928	0.080317	0.064267	0.077818	0.128188	0.122521	0.094166	0.070013	0.067262	0.089055	0.103823	0.133188	0.066505	.	0.0103	0.0003	0.0001
SRB	0.172222	0.193644	0.184822	0.125079	0.123444	0.130857	0.203858	0.153946	0.122224	0.130033	0.15262	0.122669	0.133876	0.170767	0.144593	0.046258	.	0.0007	0.0438
BG W	0.147719	0.172543	0.165591	0.134877	0.12133	0.120904	0.197622	0.122705	0.144564	0.112771	0.159201	0.169679	0.177626	0.206401	0.15856	0.065876	0.096416	.	0.0001
BG SE	0.155065	0.167474	0.159611	0.095471	0.100116	0.086508	0.175694	0.11038	0.10668	0.096349	0.099484	0.083342	0.097986	0.117094	0.160515	0.085257	0.032627	0.083052	.
